# Supplementary material for: SMARCB1 Acts as a Quiescent Gatekeeper for Cell Cycle and Immune Response in Human Cells
Source: MDPI journal article supplement (doi:10.3390/ijms21113969), 2020-06-01
Supplement: s1 [file s1]

## S.1. Supplementary data

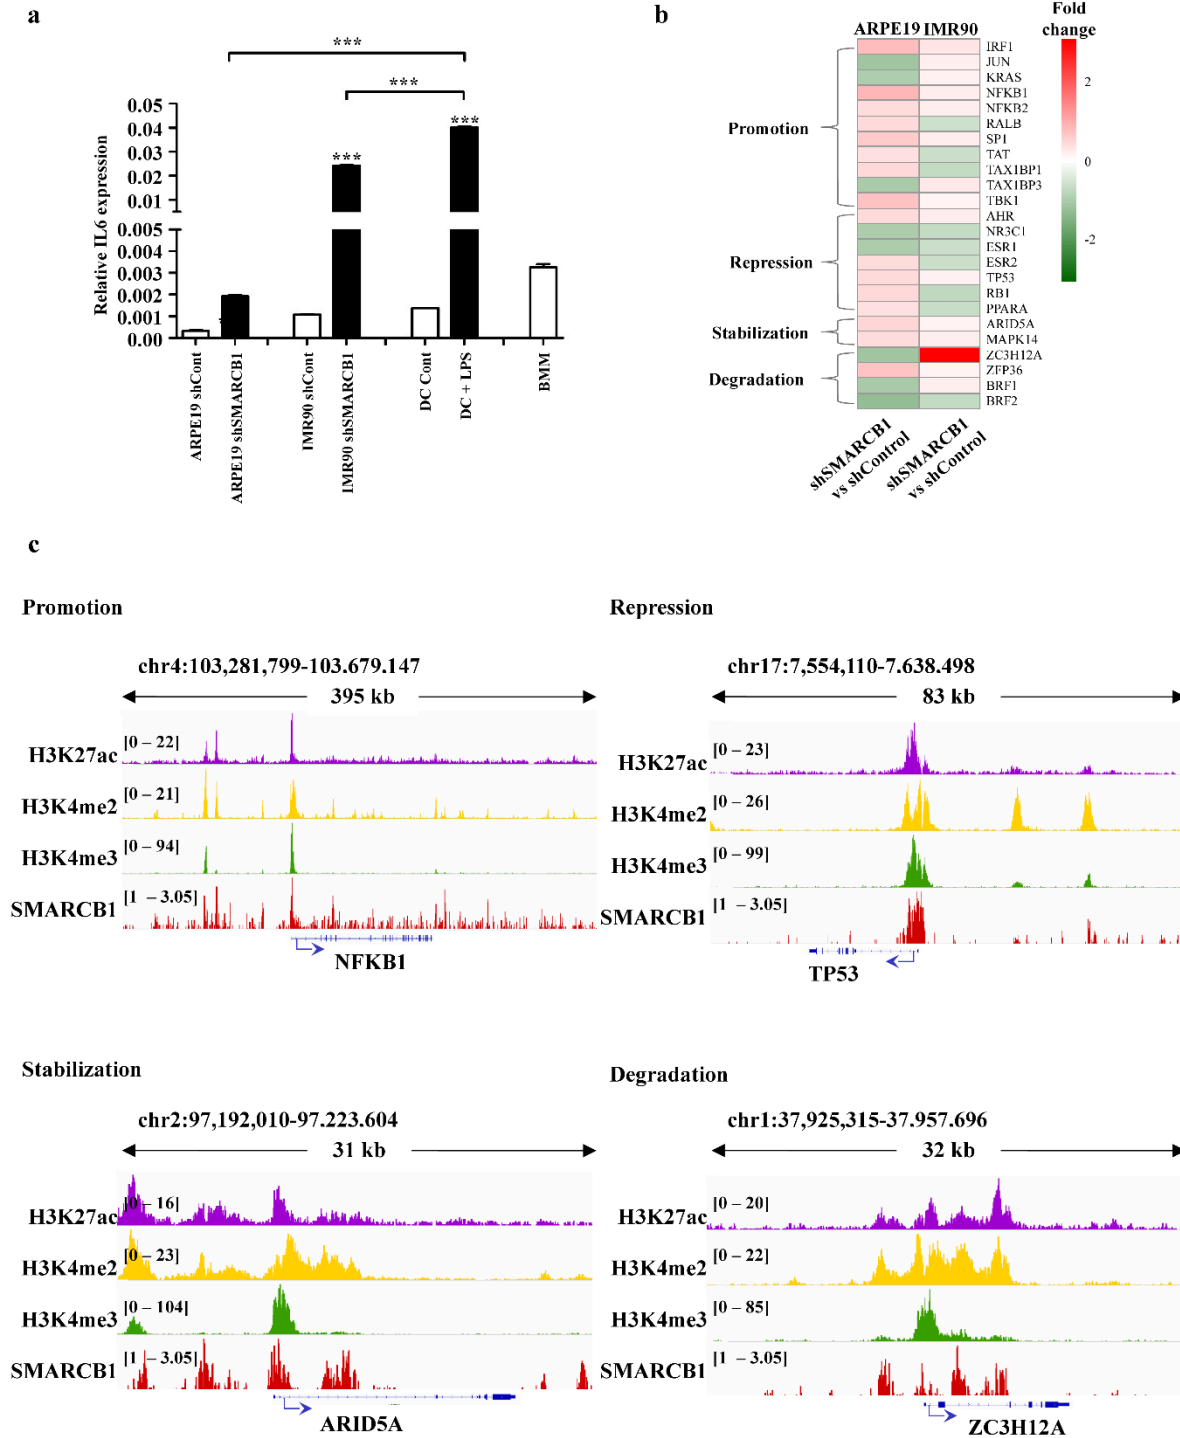

**Figure S1.** SMARCB1 binds to regulatory region of IL6 upstream regulators without transcription level change. (a) mRNA level of IL6 determined by Real time PCR. We performed three independent experiments and analyzed statistically (mean +/- S.E.M, Statistical significance \*\*\* $p < 0.001$  vs control). (b) Heatmap showing expression of IL6 upstream regulators in SMARCB1 knockdown ARPE19 and IMR90. (c) Representative screenshot showing ChIP seq signals of H3K27ac, H3K4me2, H3K4me3 and SMARCB1 near the IL6 promotion, repression, stabilization, and degradation gene in human BJ fibroblast.
